# Supplementary material for: Structural basis for COMPASS recognition of an H2B-ubiquitinated nucleosome
Source: eLife. 2020 Jan 10;9:e53199. doi: 10.7554/eLife.53199 (PMC7039682; doi:10.7554/eLife.53199)
Supplement: Figure 3—source data 1. [file elife-53199-fig3-data1.xlsx]

## Sheet: Sheet1
Swd1 mutant	Me1 (% WT)	Me2 (% WT)	Me3 (% WT)	Me1 Stdev (%)	Me2 Stdev (%)	Me3 Stdev (%)
WT	100	100	100	0	0	0
vector	4.64251	1.76947	1.67701	2.37554	1.40784	0.868304
V263A	86.9944	73.9638	69.1329	30.0281	11.0891	20.1254
I264A	27.4146	3.6724	1.8187	5.52784	3.03967	1.09803
N265A	102.926	92.818	95.4534	30.4837	24.6142	40.109
K266A	85.2807	72.966	56.2169	29.7655	16.1823	18.8422
