# Supplementary material for: Structural basis for COMPASS recognition of an H2B-ubiquitinated nucleosome
Source: eLife. 2020 Jan 10;9:e53199. doi: 10.7554/eLife.53199 (PMC7039682; doi:10.7554/eLife.53199)
Supplement: Figure 4—source data 1. [file elife-53199-fig4-data1.xlsx]

## Sheet: Sheet1
Set1 Mutant	Me1 ( %WT)	Me2 ( %WT)	Me3 ( %WT)	Me1 Stdev (%)	Me2 Stdev (%)	Me3 Stdev (%)
WT	100	100	100	0	0	0
Vector	2.81645	3.42461	2.80666	2.91849	3.3254	1.06398
R936A	63.6981	38.6497	38.5409	16.8276	9.4921	10.9892
R936E	29.6114	4.26299	2.2242	7.76981	2.25338	1.21578
R901A	16.7864	0.777526	0.510205	3.21284	0.63287	0.39619
R904A	20.9311	1.35549	0.5587	5.34659	0.755397	0.526751
R908A	6.72771	0.670111	0.462589	3.09354	0.502208	0.200155
R909A	50.726	16.7105	9.14308	13.2462	7.42752	4.41737
R901A, R904A, R908A, R909A	2.38368	0.667075	0.420827	2.41594	0.596508	0.156083
R901E	3.96755	0.453812	0.320424	2.20031	0.275328	0.192488
R904E	2.78353	0.338029	0.323269	1.97444	0.208247	0.205843
R908E	2.41127	0.760881	0.426325	1.86201	0.864493	0.351362
R909E	11.8439	0.722116	0.411428	3.67729	0.620406	0.193248
R901E, R904E, R908E, R909E	2.47153	1.03151	0.256977	3.30339	1.36329	0.111208
