# Supplementary material for: Structural basis for COMPASS recognition of an H2B-ubiquitinated nucleosome
Source: eLife. 2020 Jan 10;9:e53199. doi: 10.7554/eLife.53199 (PMC7039682; doi:10.7554/eLife.53199)
Supplement: Figure 6—source data 1. [file elife-53199-fig6-data1.xlsx]

## Sheet: Sheet1
Swd1 mutant	Me1 (% WT)	Me2 (% WT)	Me3 (% WT)	Me1 Stdev (%)	Me2 Stdev (%)	Me3 Stdev (%)
WT	100	100	100	0	0	0
vector	4.64251	1.76947	1.67701	2.37554	1.40784	0.868304
L12A	7.33874	1.92762	1.54257	5.5283	0.769022	0.529496
E14R	57.8061	28.0983	15.1923	13.6039	11.4611	5.39127
E14A	67.0181	47.2838	36.9744	20.1268	17.0547	2.05694
F9A, L12A, E14R	11.7949	2.35319	2.11895	7.57839	2.16312	1.06202
E397R	76.7059	73.0677	70.141	17.5641	23.5967	17.0268
