# Supplementary material for: Structural basis for COMPASS recognition of an H2B-ubiquitinated nucleosome
Source: eLife journal article supplement (doi:10.7554/elife.53199), 2020-01-10
Supplement: supp [file elife_poa_e53199_Figure_3_figure_supplement_1.pdf › elife_poa_e53199_Figure_3_figure_supplement_1.pdf]

## Figure 3 - Figure Supplement 1

a

## Ub-binding

|    |       | .1.....10.....20.....30.....40.....50.....                   |    |
|----|-------|--------------------------------------------------------------|----|
| Sc | Swd1  | -MNILLQDPFAVLKEHPEKLTHTIENPLRTECLQFSPCGDYALGCANGALVIYDMDTFR  | 59 |
| Sp | Swd1  | -MNLELLDPFSI-PDYPEALTTTLKHGH-ATSIRFSTNGYHLASGLVNGSVVIWDLSTFS | 57 |
| Kl | Swd1  | MANLLLQDPFGVLKEYPEKLTHTLEVPAAVCVKFSRPGDYLA VGCSNGAIIYDMDSLK  | 60 |
| Dm | RBBP5 | -MNLELLESFG-QNYPEEFDGSLDCISLAVTCAFNKYGTLLAVGCNDGRIVIWDFLTRG  | 57 |
| Xt | RBBP5 | -MNLELLESFG-QNYPEEADGTLD CISMALTCTFNRWGTLLAVGCNDGRIVIWDFLTRG | 57 |
| Mm | RBBP5 | -MNLELLESFG-QNYPEEADGTLD CISMALTCTFNRWGTLLAVGCNDGRIVIWDFLTRG | 57 |
| Hs | RBBP5 | -MNLELLESFG-QNYPEEADGTLD CISMALTCTFNRWGTLLAVGCNDGRIVIWDFLTRG | 57 |
|    |       | *: * : * . : : * : : : * . * * * : * : : * : :               |    |

## Loop1

## Loop2

|    |       |                                                  |                    |
|----|-------|--------------------------------------------------|--------------------|
|    |       | .....250.....260.....270.....280.....290.....300 |                    |
| Sc | Swd1  | N-----SAVELTLEHKYQDVINKLQWNCILFSNNTAEYLVASTHGS   | SAHELYIWETTSG 302  |
| Sp | Swd1  | -----NPEVEHKFQDVVNRLQWNSCGFSQT-GEFVFA-TTYQ       | MAHAIYVWERGMG 288  |
| Kl | Swd1  | ESEGGSSHSVSIIELEHKYQDIINRLQWNTIFFSNHSGEYLVASAHGS | SAHDLYLWETSSG 310  |
| Dm | RBBP5 | LG-----KDGEPEPIQKLQDLVNKTTWKKCCFSGD-GEYICAGS--   | ARQHAILYWEKSIG 283 |
| Xt | RBBP5 | CG-----RDGEPEPMQKLQDLVNRTPWKKCCFSGD-GEYIVAGS--   | ARQHAILYWEKSIG 284 |
| Mm | RBBP5 | CG-----RDGEPEPMQKLQDLVNRTPWKKCCFSGD-GEYIVAGS--   | ARQHAILYWEKSIG 284 |
| Hs | RBBP5 | CG-----RDGEPEPMQKLQDLVNRTPWKKCCFSGD-GEYIVAGS--   | ARQHAILYWEKSIG 284 |
|    |       | . : * **::: * : ** .*: : * : * :*: ** *          |                    |

## Ub-binding

|    |       |                                                             |     |
|----|-------|-------------------------------------------------------------|-----|
|    |       | .....390.....400.....410.....420...426                      |     |
| Sc | Swd1  | LEQEEIIAIDLRTREQYDVRGN-----NLLVERFTIPTDYTRIIMQSS-----       | 426 |
| Sp | Swd1  | ----EEYFTSVVKILP---HD-----SSAEQPFVMPPTLSSS-----             | 398 |
| Kl | Swd1  | MTEAEIIAIDLCTPEKYDVRGN-----DISMPSFVIPIDYEGVIIQQHWAHQEQ----  | 439 |
| Dm | RBBP5 | AQQDEEIEVDVQKVEPVAAFCSSDEEGEDENALQFLMAPEVED--PEDGWTGQDGLEPS | 422 |
| Xt | RBBP5 | GDAAEDEEVDVTSVDPIAAFCSSDEDLEDTKALLYLPIAPEVED--PEENPYGPP--PD | 421 |
| Mm | RBBP5 | ADAAEDEEVDVTSVDPIAAFCSSDEELEDKALLYLPIAPEVED--PEENPYGPP--PD  | 421 |
| Hs | RBBP5 | ADAAEDEEVDVTSVDPIAAFCSSDEELEDKALLYLPIAPEVED--PEENPYGPP--PD  | 421 |
|    |       | *: .: . . . . . : :                                         |     |

**b**

## RxR motif

|    |       |                                                             |      |
|----|-------|-------------------------------------------------------------|------|
|    |       | .....890.....900.....910.....920.....930.....               |      |
| Sc | Set1  | REESSNKEPSDSVPQEVSRRDNRASNRRFQQDIEAQKAAIGTESELLSLNQLNK-RKKP | 939  |
| Kl | Set1  | GTESTNQEADLEQDNHNASSRLNRVFRRFQQDIEAQRAAIGFESDLLSLNQGTK-RKKP | 859  |
| Sp | Set1  | -----ISHSTRITSRMNRVNRRRLAAGVE--KSQLPAEADLLRNFNALKA-RKKQ     | 782  |
| Mm | Set1A | -----GDTQGTRNV-LSERRSEQRRLLSAIG---TSAIMSDLLKLNLKF-RKKK      | 1578 |
| Hs | Set1A | -----VDTGTRNV-LSERRSEQRRLLSAIG---TSAIMSDLLKLNLKF-RKKK       | 1569 |
| Hs | Set1B | -----SIPAPHASTRA-GSERRSEQRRLSSFT----GSCDSLLKFNQLKF-RKKK     | 1828 |
| Hs | MLL1  | -----EVQLKSARRA-----TSMD----L---PMPMRFRHLKKTKEA             | 3830 |
| Hs | MLL2  | -----EVQLRSTRRA-----TSLE----L---PMAMRFRHLKKTKEA             | 2576 |
| Hs | MLL3  | -----STSTSKSFQSTVTGELNAPYSKQFVHSKSSQYRKMKTEWKSNN            | 4772 |
| Hs | MLL4  | -----STSMSKAYQSTFTGETNTPYSKQFVHSKSSQYRRLRTEWKNN             | 5398 |
|    |       | : : * . : . * * :                                           |      |

C

## Ub-binding loop

|    |       |                                                              |     |
|----|-------|--------------------------------------------------------------|-----|
|    |       | ..130.....140.....150.....160.....170.....180.....           |     |
| Sc | Bre2  | IKEGPTYWEVEVIRGGNKKFADGVNNKENADDSVDEVQSGIYEKMHKQVNDTPHLRFGVC | 187 |
| Sp | Bre2  | MTSGEWYFEIKIEKGGG-----DDGAHVRIGVS                            | 412 |
| Kl | Bre2  | MKEGKIYWEVEVK-----NVSDTSHIRCGIS                              | 139 |
| Dm | Ash2  | VNRGCWYFEVTIE-----EMPDGAATRLGWG                              | 369 |
| Xt | Ash2L | VRKGAWYFEIFVD-----EMPPDTAARLGS                               | 396 |
| Mm | Ash2L | VRKGAWYFEITVD-----EMPPDTAARLGS                               | 436 |
| Hs | Ash2L | VRKGAWYFEITVD-----EMPPDTAARLGS                               | 441 |
|    |       | : * * : : :                                                  |     |
|    |       |                                                              | * * |
