# Supplementary figures and images for: Structural basis for COMPASS recognition of an H2B-ubiquitinated nucleosome
Source: eLife journal article supplement (doi:10.7554/elife.53199), 2020-01-10

# Figure 1 - Figure Supplement 2

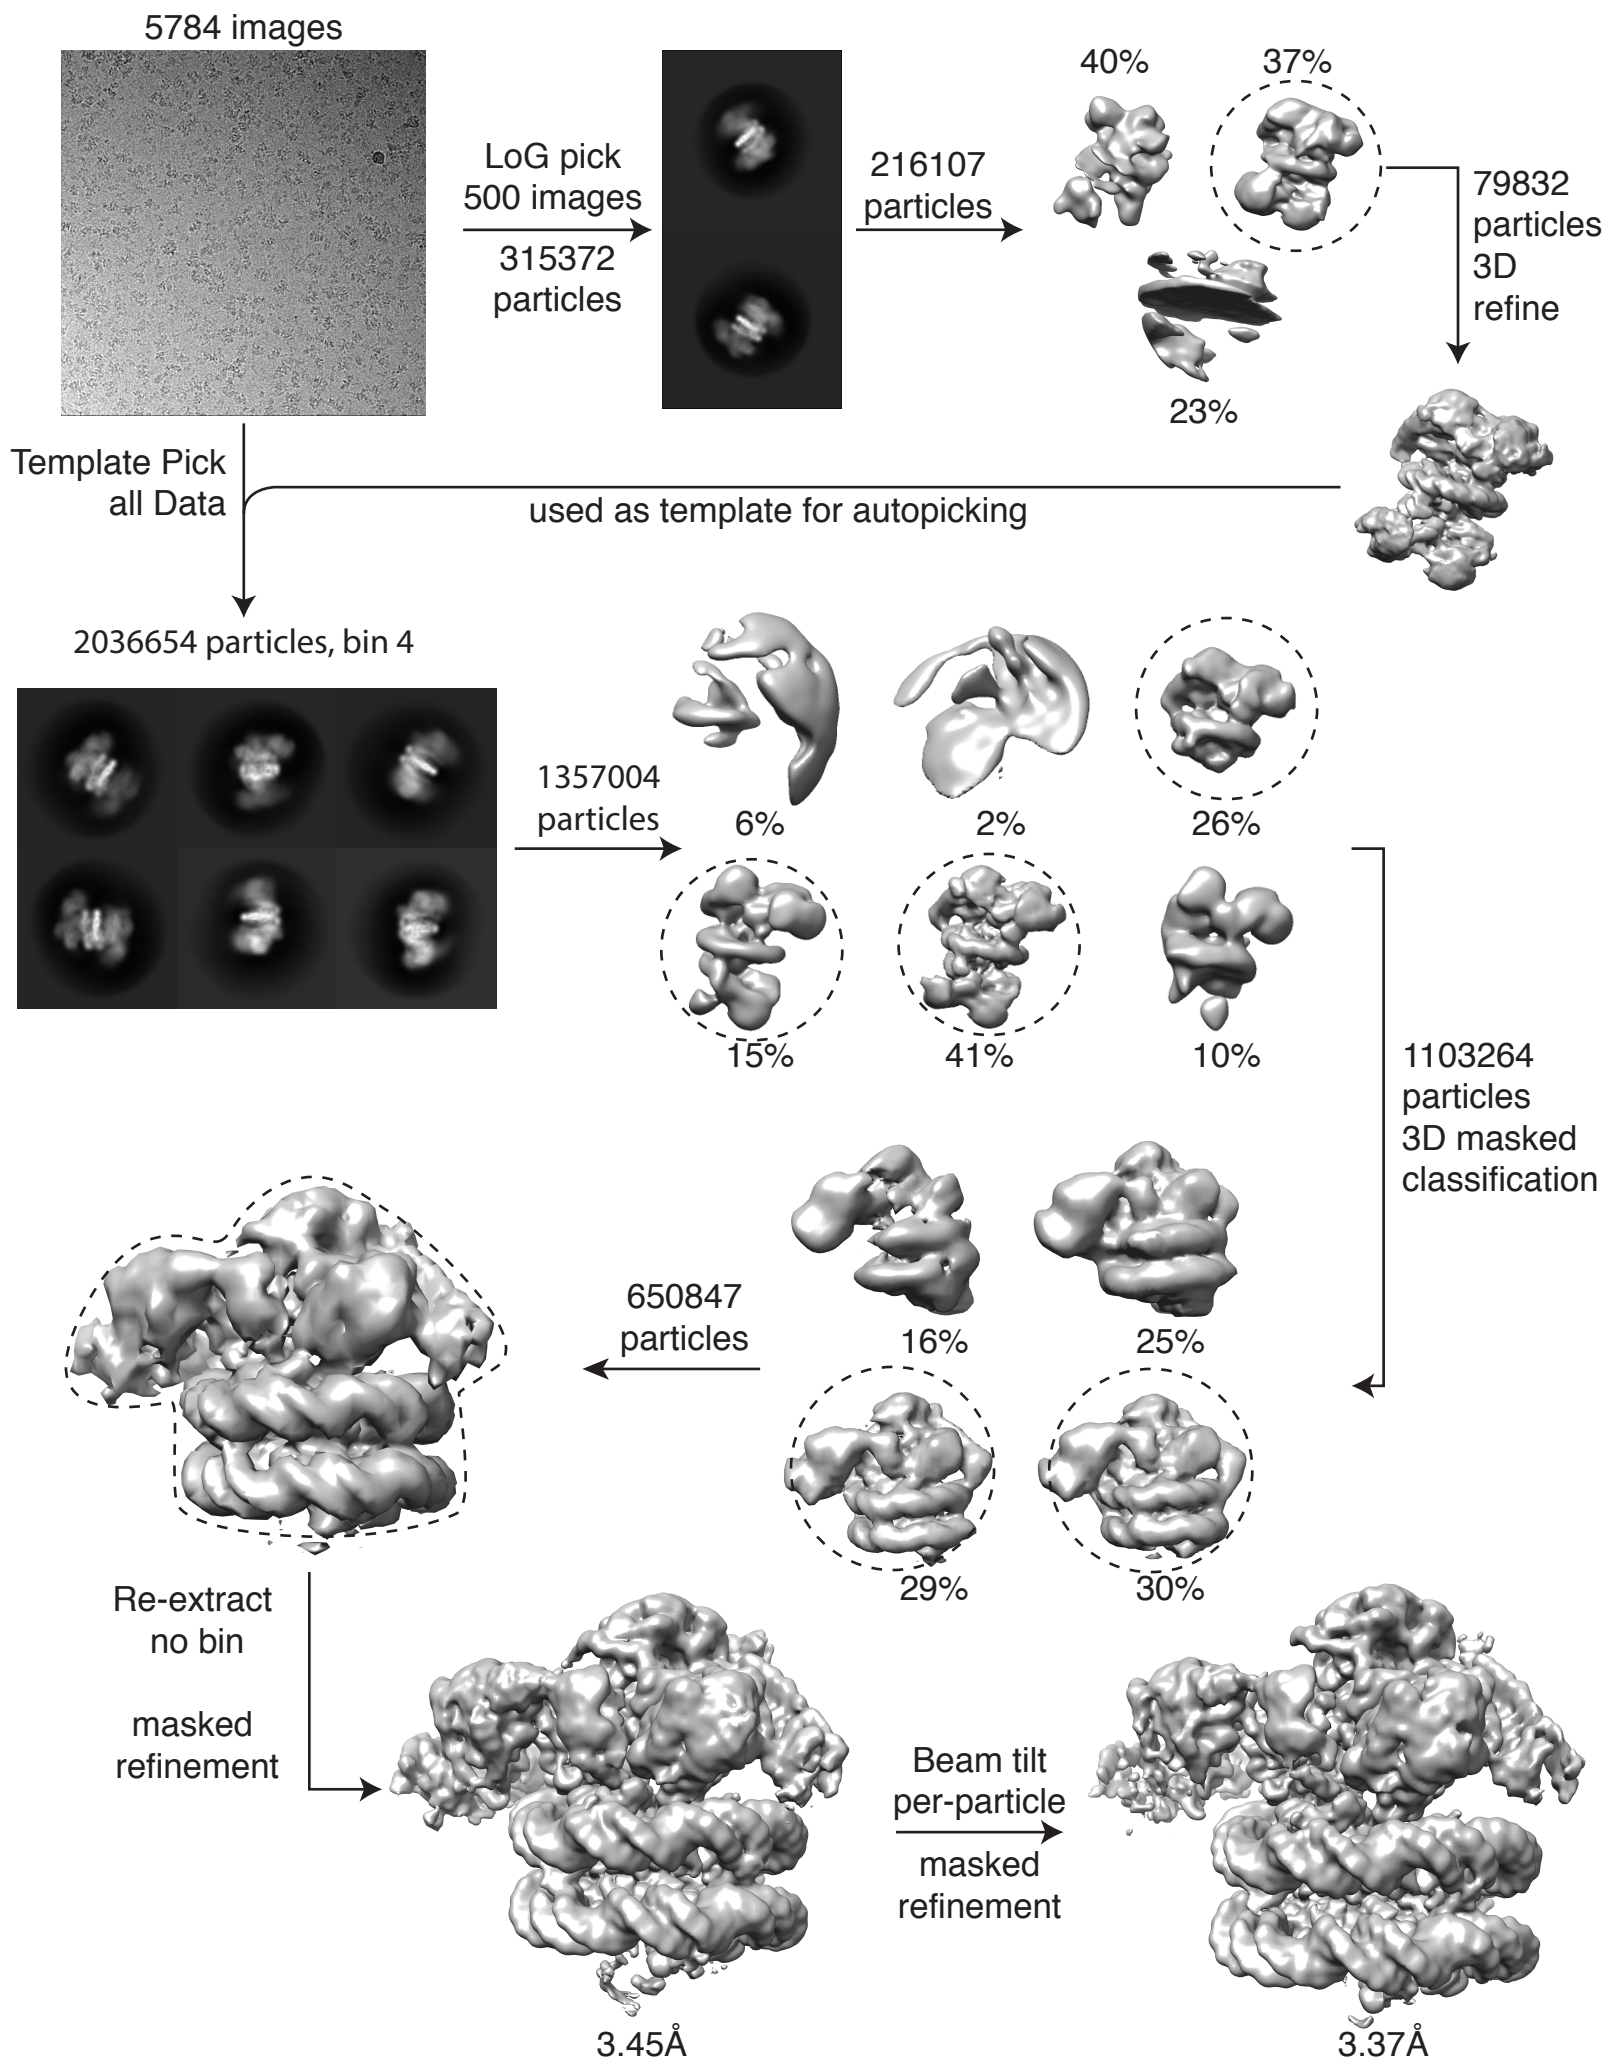

Supplement: supp [file elife_poa_e53199_Figure_1_figure_supplement_2.pdf › elife_poa_e53199_Figure_1_figure_supplement_2.pdf]
